# Supplementary material
Source: PubMed Central journal article supplement (PMC10192157)
Supplement: NIHMS1886052-supplement-supinfo1.pdf [file NIHMS1886052-supplement-supinfo1.pdf]

# Circadian regulation of glutamate release pathways shapes synaptic throughput in the brainstem nucleus of the solitary tract (NTS).

Forrest J Ragozzino, BreeAnne Peterson, Ilia Nicholas Karatsoreos, and James Henry Peters

DOI: 10.1113/JP284370

Corresponding author(s): James Peters ([james\\_peters@wsu.edu](mailto:james_peters@wsu.edu))

The following individual(s) involved in review of this submission have agreed to reveal their identity: Marian H Lewandowski (Referee #2)

---

## Review Timeline:

|                     |             |
|---------------------|-------------|
| Submission Date:    | 12-Jan-2023 |
| Editorial Decision: | 13-Feb-2023 |
| Revision Received:  | 24-Feb-2023 |
| Accepted:           | 06-Mar-2023 |

---

Senior Editor: David Wyllie

Reviewing Editor: Nathan Schoppa

## Transaction Report:

(Note: With the exception of the correction of typographical or spelling errors that could be a source of ambiguity, letters and reports are not edited. Depending on transfer agreements, referee reports obtained elsewhere may or may not be included in this compilation. Referee reports are anonymous unless the Referee chooses to sign their reports.)

Dear Dr Peters,

Re: JP-RP-2023-284370 "Circadian regulation of glutamate release pathways shapes synaptic throughput in the brainstem nucleus of the solitary tract (NTS)." by Forrest J Ragozzino, BreeAnne Peterson, Ilia Nicholas Karatsoreos, and James Henry Peters

Thank you for submitting your manuscript to The Journal of Physiology. It has been assessed by a Reviewing Editor and by 2 expert referees and we are pleased to tell you that it is acceptable for publication following satisfactory revision.

Please advise your co-authors of this decision as soon as possible.

The referee reports are copied at the end of this email.

Please address all the points raised and incorporate all requested revisions or explain in your Response to Referees why a change has not been made. We hope you will find the comments helpful and that you will be able to return your revised manuscript within 4 weeks. If you require longer than this, please contact journal staff: [jp@physoc.org](mailto:jp@physoc.org).

Your revised manuscript should be submitted online using the link in your Author Tasks: Link Not Available. This link is accessible via your account as Corresponding Author; it is not available to your co-authors. If this presents a problem, please contact journal staff ([jp@physoc.org](mailto:jp@physoc.org)). Image files from the previous version are retained on the system. Please ensure you replace or remove any files that are being revised.

If you do not wish to submit a revised version of your manuscript, you must inform our journal staff ([jp@physoc.org](mailto:jp@physoc.org)) or reply to this email to request withdrawal. Please note that a manuscript must be formally withdrawn from the peer review process at one journal before it may be submitted to another journal.

**TRANSPARENT PEER REVIEW POLICY:** To improve the transparency of its peer review process, The Journal of Physiology publishes online as supporting information the peer review history of all articles accepted for publication. Readers will have access to decision letters, including Editors' comments and referee reports, for each version of the manuscript, as well as any author responses to peer review comments. Referees can decide whether or not they wish to be named on the peer review history document.

**ABSTRACT FIGURES:** Authors are expected to use The Journal's premium BioRender account to create/redraw their Abstract Figures. Information on how to access this account is here: <https://physoc.onlinelibrary.wiley.com/journal/14697793/biorender-access>.

This will enable Authors to create and download high-resolution figures. If authors have used the free BioRender service, they can use the instructions provided in the link above to download a high-resolution version suitable for publication.

The link provided should only be used for the purposes of this submission. Authors will be charged for figures created on this account if they are not related to this manuscript submission.

**LANGUAGE EDITING AND SUPPORT FOR PUBLICATION:** If you would like help with English language editing, or other article preparation support, Wiley Editing Services offers expert help, including English Language Editing, as well as translation, manuscript formatting, and figure formatting at [www.wileyauthors.com/eeo/preparation](http://www.wileyauthors.com/eeo/preparation). You can also find resources for Preparing Your Article for general guidance about writing and preparing your manuscript at [www.wileyauthors.com/eeo/prepresources](http://www.wileyauthors.com/eeo/prepresources).

#### REVISION CHECKLIST:

Check that your Methods section conforms to journal policy: [https://jp.msubmit.net/cgi-bin/main.plex?form\\_type=display\\_requirements#methods](https://jp.msubmit.net/cgi-bin/main.plex?form_type=display_requirements#methods).

Check that data presented conforms to the statistics policy: [https://jp.msubmit.net/cgi-bin/main.plex?form\\_type=display\\_requirements#statistics](https://jp.msubmit.net/cgi-bin/main.plex?form_type=display_requirements#statistics).

Upload a full Response to Referees file. To create your 'Response to Referees' copy all the reports, including any comments from the Senior and Reviewing Editors, into a Microsoft Word, or similar, file and respond to each point, using font or background colour to distinguish comments and responses and upload as the required file type.

Please upload two versions of your manuscript text: one with all relevant changes highlighted and one clean version with no changes tracked. The manuscript file should include all tables and figure legends, but each figure/graph should be uploaded as separate, high-resolution files.

You may also upload:

- 'Potential Cover Art' for consideration as the issue's cover image
- Appropriate Supporting Information (Video, audio or data set: see [https://jp.msubmit.net/cgi-bin/main.plex?form\\_type=display\\_requirements#supp](https://jp.msubmit.net/cgi-bin/main.plex?form_type=display_requirements#supp)).

We look forward to receiving your revised submission.

If you have any queries, please reply to this email and we will be pleased to advise.

Yours sincerely,

David Wyllie  
Senior Editor  
The Journal of Physiology

-----  
**REQUIRED ITEMS**

- Author photo and profile. First (or joint first) authors are asked to provide a short biography (no more than 100 words for one author or 150 words in total for joint first authors) and a portrait photograph. These should be uploaded and clearly labelled with the revised version of the manuscript. See [Information for Authors](#) for further details.
  - An ethics approval number and more details on euthanasia are needed. You must start the Methods section with a paragraph headed [Ethical Approval](#). A detailed explanation of journal policy and regulations on animal experimentation is given in [Principles and standards for reporting animal experiments in The Journal of Physiology and Experimental Physiology](#) by David Grundy *J Physiol*, 593: 2547-2549. doi:10.1113/JP270818). A checklist outlining these requirements and detailing the information that must be provided in the paper can be found at: <https://physoc.onlinelibrary.wiley.com/hub/animal-experiments>. Authors should confirm in their Methods section that their experiments were carried out according to the guidelines laid down by their institution's animal welfare committee, and conform to the principles and regulations as described in the Editorial by Grundy (2015). The Methods section must contain details of the anaesthetic regime: anaesthetic used, dose and route of administration and method of killing the experimental animals.
  - "The Journal of Physiology funds authors of provisionally accepted papers to use the premium BioRender site to create high resolution schematic figures. Follow this [link](#) and enter your details and the manuscript number to create and download figures. Upload these as the figure files for your revised submission. If you choose not to take up this offer we require figures to be of similar quality and resolution. If you are opting out of this service to authors, state this in the Comments section on the Detailed Information page of the submission form. The link provided should only be used for the purposes of this submission. Authors will be charged for figures created on this premium BioRender account if they are not related to this manuscript submission.
  - "Please upload separate high-quality [figure files](#) via the submission form.
  - A Statistical Summary Document, summarising the statistics presented in the manuscript, is required upon revision. It must be on the Journal's template, which can be downloaded from the link in the Statistical Summary Document section here: [https://jp.msubmit.net/cgi-bin/main.plex?form\\_type=display\\_requirements#statistics](https://jp.msubmit.net/cgi-bin/main.plex?form_type=display_requirements#statistics).
  - Papers must comply with the Statistics Policy: [https://jp.msubmit.net/cgi-bin/main.plex?form\\_type=display\\_requirements#statistics](https://jp.msubmit.net/cgi-bin/main.plex?form_type=display_requirements#statistics).
- In summary:
- If  $n \leq 30$ , all data points must be plotted in the figure in a way that reveals their range and distribution. A bar graph with data points overlaid, a box and whisker plot or a violin plot (preferably with data points included) are acceptable formats.
  - If  $n > 30$ , then the entire raw dataset must be made available either as supporting information, or hosted on a not-for-profit repository e.g. FigShare, with access details provided in the manuscript.
  - 'n' clearly defined (e.g. x cells from y slices in z animals) in the Methods. Authors should be mindful of pseudoreplication.
  - All relevant 'n' values must be clearly stated in the main text, figures and tables, and the Statistical Summary Document (required upon revision).
  - The most appropriate summary statistic (e.g. mean or median and standard deviation) must be used. Standard Error of the Mean (SEM) alone is not permitted.
  - Exact p values must be stated. Authors must not use 'greater than' or 'less than'. Exact p values must be stated to three

significant figures even when 'no statistical significance' is claimed.

- Statistics Summary Document completed appropriately upon revision.

- Please include an Abstract Figure file, as well as the figure legend text within the main article file. The Abstract Figure is a piece of artwork designed to give readers an immediate understanding of the research and should summarise the main conclusions. If possible, the image should be easily 'readable' from left to right or top to bottom. It should show the physiological relevance of the manuscript so readers can assess the importance and content of its findings. Abstract Figures should not merely recapitulate other figures in the manuscript. Please try to keep the diagram as simple as possible and without superfluous information that may distract from the main conclusion(s). Abstract Figures must be provided by authors no later than the revised manuscript stage and should be uploaded as a separate file during online submission labelled as File Type 'Abstract Figure'. Please ensure that you include the figure legend in the main article file. All Abstract Figures should be created using BioRender. Authors should use The Journal's premium BioRender account to export high-resolution images. Details on how to use and access the premium account are included as part of this email.

-----  
EDITOR COMMENTS

Reviewing Editor:

Autonomic reflexes that are mediated by the vagal nerve are under strong circadian regulation, but the underlying physiological mechanisms for the rhythms are not well-understood. This study uses patch-clamp methods in an ex vivo preparation to examine the mechanisms of circadian regulation of transmission from the vagal afferents onto neurons in the brainstem nucleus of the solitary tract (NTS). Two important changes are observed which, interestingly, have opposite dependences with the light-dark cycle. The first is a higher frequency of spontaneous glutamate release events that causes NTS neurons to have a higher basal firing rate during light, while the second is a higher afferent-evoked firing rate for NTS neurons during dark that is due to reduced membrane conductance. The authors suggest a number of potential physiological functions that could be associated with these opposing changes in basal versus evoked transmission.

The manuscript has been reviewed by two expert reviewers, both of whom were very positive about the significance of the study. The reviewers also raised no significant objections around the quality or interpretation of the experiments. In my own analysis, I found one issue around the error bars in the figures and the error values in the main text. I could not find information to indicate whether they reflect standard deviations (SDs) or standard errors. They should all be SDs, and this should clearly indicated in the Methods and the first time the convention is used in the results. The authors should address this and the other minor points raised by the reviewers.

Senior Editor:

Your manuscript has been assessed by two expert referees and a Reviewing Editor. As you will read, each are very positive about this work and suggest only a relatively few changes/clarifications. Please pay particular attention to you Statistics Policy and report SD (not SEM) and provide precise P values unless less than 0.0001. In addition, you will need to provide a Statistics Summary Document with the revised submission. Thanks you for submitting this work to The Journal of Physiology.

-----  
REFEREE COMMENTS

Referee #1:

In this study, the authors examine circadian regulation of neurotransmitter release in the brain stem nucleus of the solitary tract. They observe strong circadian rhythmicity of spontaneous quantal glutamatergic neurotransmission onto NTS neurons. Where highest rate of release during the light phase and lowest in the dark. Interestingly, this circadian oscillation of spontaneous release was sufficient to regulate action potential firing. They also observe that the regulation of evoked release was completely the opposite where it was enhanced through the night and diminished during the day. The presynaptic changes that regulate evoked release were also coupled with alterations in conductance.

Overall, I do not have much to add to this work. The authors could have validated that the fluctuations they see are indeed due to circadian rhythms by testing them in a mutant (e.g. CLOCK mice). However, I strongly believe this is beyond the scope of the current work. I believe this is an extremely important study and to my knowledge it is the first of its kind. Synaptic transmission is typically monitored in short time frames, often in response to brief stimulation patterns and responses are followed for up to a maximum of a few hours. This study therefore opens up a new avenue focusing on long term oscillation and/or stability of neurotransmission patterns in an intact circuit. Therefore, it has implications beyond the NTS. Authors may want to comment on this in the discussion. In particular, given the proposed roles of spontaneous neurotransmission in homeostatic plasticity, its long-term rhythmicity may also impact synaptic strength.

\*\*\*

Referee #2:

The reviewed manuscript deals with very topical issues related to the mechanisms of biological rhythms. Novel findings question the dominance of one oscillator, giving evidence for the involvement of SCN-independent, endogenous neuronal and non-neuronal clocks, located in multiple brain structures and throughout the body. One of these structures, which is the subject of research by Peters' group, is the nucleus of the solitary tract (NTS) in the brainstem. The authors, using ex vivo patch clamp electrophysiology methods, studied the circadian profile of neurotransmission activity in the NTS and its synaptic connection. They showed a clear circadian spontaneous secretion of glutamate, which is the reason for the day-night activity of action potentials generated in the postsynapse. They also determined diurnal changes in postsynaptic membrane conductance that promote circadian neurotransmitter secretion and synaptic communication under changing conditions of light and dark. In my opinion, the obtained results have a great impact on chronobiology research, in particular on understanding its neural mechanisms. And considering that the NTS receives information via the vagus nerve from peripheral organs to ensure vital body functions (nutrition, energy balance and other autonomic regulation), the presented results are of great importance for understanding the physiology of our body. The originality of the presented studies lies in the fact that they are the first electrophysiological studies of NTS and its connections. They complement previous research, especially by the group of Chrobok et al., 2020, which the authors often refer to.

I have no comments on the research methodology, analysis of results and their clear presentation. The discussion is conducted objectively and carefully, based on the results obtained earlier, with an indication of those elements that require further in-depth research.

Minor remarks

The author should carefully follow the reference:

Lines 568 and 640 are repeated lines 662 and 665.

Also release probabilities (Pr) are marked by the author sometimes with an apostrophe (lines 478, 493) and once without (line 472).

---

END OF COMMENTS

**Confidential Review**

**12-Jan-2023**

---



JOURNAL OF PHYSIOLOGY

MANUSCRIPT: JP-RP-2023-284370

TITLE: "Circadian regulation of glutamate release pathways shapes synaptic throughput in the brainstem nucleus of the solitary tract (NTS)."

AUTHORS: Forrest J. Ragozzino, BreeAnne Peterson, Ilia Nicholas Karatsoreos, and James Henry Peters

#### RESPONSE TO THE REVIEWERS / EDITORIAL COMMENTS:

We are thrilled with feedback from the reviewers and decision by the editors. Thank you for the careful review and support of this line of investigation. We have noted our replies to the specific comments below and the associated changes in the manuscript.

#### REFEREE COMMENTS

*Referee #1:*

*In this study, the authors examine circadian regulation of neurotransmitter release in the brainstem nucleus of the solitary tract. They observe strong circadian rhythmicity of spontaneous quantal glutamatergic neurotransmission onto NTS neurons. Where highest rate of release during the light phase and lowest in the dark. Interestingly, this circadian oscillation of spontaneous release was sufficient to regulate action potential firing. They also observe that the regulation of evoked release was completely the opposite where it was enhanced through the night and diminished during the day. The presynaptic changes that regulate evoked release were also coupled with alterations in conductance.*

*Overall, I do not have much to add to this work. The authors could have validated that the fluctuations they see are indeed due to circadian rhythms by testing them in a mutant (e.g. CLOCK mice). However, I strongly believe this is beyond the scope of the current work. I believe this is an extremely important study and to my knowledge it is the first of its kind. Synaptic transmission is typically monitored in short time frames, often in response to brief stimulation patterns and responses are followed for up to a maximum of a few hours. This study therefore opens up a new avenue focusing on long term oscillation and/or stability of neurotransmission patterns in an intact circuit. Therefore, it has implications beyond the NTS. Authors may want to comment on this in the discussion. In particular, given the proposed roles of spontaneous neurotransmission in homeostatic plasticity, its long-term rhythmicity may also impact synaptic strength.*

**Thank you for the supportive comments and appreciation of the work. We have now added text in the discussion section addressing the final sentences in the second paragraph. These additional discussion points can be found on Page 22, lines 444-446 and Page 25, lines 519-521 of the revised manuscript.**

\*\*\*

Referee #2:

*The reviewed manuscript deals with very topical issues related to the mechanisms of biological rhythms. Novel findings question the dominance of one oscillator, giving evidence for the involvement of SCN-independent, endogenous neuronal and non-neuronal clocks, located in multiple brain structures and throughout the body. One of these structures, which is the subject of research by Peters' group, is the nucleus of the solitary tract (NTS) in the brainstem. The authors, using ex vivo patch clamp electrophysiology methods, studied the circadian profile of neurotransmission activity in the NTS and its synaptic connection. They showed a clear circadian spontaneous secretion of glutamate, which is the reason for the day-night activity of action potentials generated in the postsynapse. They also determined diurnal changes in postsynaptic membrane conductance that promote circadian neurotransmitter secretion and synaptic communication under changing conditions of light and dark. In my opinion, the obtained results have a great impact on chronobiology research, in particular on understanding its neural mechanisms. And considering that the NTS receives information via the vagus nerve from peripheral organs to ensure vital body functions (nutrition, energy balance and other autonomic regulation), the presented results are of great importance for understanding the physiology of our body. The originality of the presented studies lies in the fact that they are the first electrophysiological studies of NTS and its connections. They complement previous research, especially by the group of Chrobok et al., 2020, which the authors often refer to.*

*I have no comments on the research methodology, analysis of results and their clear presentation. The discussion is conducted objectively and carefully, based on the results obtained earlier, with an indication of those elements that require further in-depth research.*

*Minor remarks*

*The author should carefully follow the reference:*

*Lines 568 and 640 are repeated lines 662 and 665.*

**Apologies, it is not clear to us what is indicated with the comment above. We have checked for repeated references and did not find any. Please advise and we are happy to update the manuscript.**

*Also release probabilities ( $P_r$ ) are marked by the author sometimes with an apostrophe (lines 478, 493) and once without (line 472).*

**Thank you for pointing this out. All instances of  $P_r$  are now made uniform in the text.**



EDITORIAL:

- *Author photo and profile. First (or joint first) authors are asked to provide a short biography (no more than 100 words for one author or 150 words in total for joint first authors) and a portrait photograph. These should be uploaded and clearly labelled with the revised version of the manuscript. See [Information for Authors](#) for further details.*

**This has now been provided for Dr. Ragozzino and uploaded with the resubmission.**

- *An ethics approval number and more details on euthanasia are needed. You must start the Methods section with a paragraph headed [Ethical Approval](#). A detailed explanation of journal policy and regulations on animal experimentation is given in [Principles and standards for reporting animal experiments in The Journal of Physiology and Experimental Physiology](#) by David Grundy J Physiol, 593: 2547-2549. doi:10.1113/JP270818). A checklist outlining these requirements and detailing the information that must be provided in the paper can be found at: <https://physoc.onlinelibrary.wiley.com/hub/animal-experiments>. Authors should confirm in their Methods section that their experiments were carried out according to the guidelines laid down by their institution's animal welfare committee, and conform to the principles and regulations as described in the Editorial by Grundy (2015). The Methods section must contain details of the anaesthetic regime: anaesthetic used, dose and route of administration and method of killing the experimental animals.*

**Attention to these issues in the above paragraph have now all been directly addressed in the revised manuscript.**

- *"The Journal of Physiology funds authors of provisionally accepted papers to use the premium BioRender site to create high resolution schematic figures. Follow this [link](#) and enter your details and the manuscript number to create and download figures. Upload these as the figure files for your revised submission. If you choose not to take up this offer we require figures to be of similar quality and resolution. If you are opting out of this service to authors, state this in the Comments section on the Detailed Information page of the submission form. The link provided should only be used for the purposes of this submission. Authors will be charged for figures created on this premium BioRender account if they are not related to this manuscript submission.*

**The Abstract Figure is now included in the revised submission and was made using the available access to BioRender (thank you!). The Abstract Figure Legend is included in the main draft of the manuscript in the Figure Legends section.**

-*Please upload separate high-quality [figure files](#) via the submission form.*

- A Statistical Summary Document, summarising the statistics presented in the manuscript, is required upon revision. It must be on the Journal's template, which can be downloaded from the link in the Statistical Summary Document section here:

[https://jp.msubmit.net/cgi-bin/main.plex?form\\_type=display\\_requirements#statistics](https://jp.msubmit.net/cgi-bin/main.plex?form_type=display_requirements#statistics).

- Papers must comply with the Statistics Policy:

[https://jp.msubmit.net/cgi-bin/main.plex?form\\_type=display\\_requirements#statistics](https://jp.msubmit.net/cgi-bin/main.plex?form_type=display_requirements#statistics).

In summary:

- If  $n > 30$ , all data points must be plotted in the figure in a way that reveals their range and distribution. A bar graph with data points overlaid, a box and whisker plot or a violin plot (preferably with data points included) are acceptable formats.

- If  $n > 30$ , then the entire raw dataset must be made available either as supporting information, or hosted on a not-for-profit repository e.g. FigShare, with access details provided in the manuscript.

- 'n' clearly defined (e.g. x cells from y slices in z animals) in the Methods. Authors should be mindful of pseudoreplication.

- All relevant 'n' values must be clearly stated in the main text, figures and tables, and the Statistical Summary Document (required upon revision).

- The most appropriate summary statistic (e.g. mean or median and standard deviation) must be used. Standard Error of the Mean (SEM) alone is not permitted.

- Exact p values must be stated. Authors must not use 'greater than' or 'less than'. Exact p values must be stated to three significant figures even when 'no statistical significance' is claimed.

- Statistics Summary Document completed appropriately upon revision.

- Please include an Abstract Figure file, as well as the figure legend text within the main article file. The Abstract Figure is a piece of artwork designed to give readers an immediate understanding of the research and should summarise the main conclusions. If possible, the image should be easily 'readable' from left to right or top to bottom. It should show the physiological relevance of the manuscript so readers can assess the importance and content of its findings. Abstract Figures should not merely recapitulate other figures in the manuscript. Please try to keep the diagram as simple as possible and without superfluous information that may distract from the main conclusion(s). Abstract Figures must be provided by authors no later than the revised manuscript stage and should be uploaded as a separate file during online submission labelled as File Type 'Abstract Figure'. Please ensure that you include the figure legend in the main article file. All Abstract Figures should be created using BioRender. Authors

should use The Journal's premium BioRender account to export high-resolution images. Details on how to use and access the premium account are included as part of this email.

**These issues have been addressed. Please let us know if there are any other details we need to attend to.**

**Thank you.**

Dear Dr Peters,

Re: JP-RP-2023-284370R1 "Circadian regulation of glutamate release pathways shapes synaptic throughput in the brainstem nucleus of the solitary tract (NTS)." by Forrest J Ragozzino, BreeAnne Peterson, Iliia Nicholas Karatsoreos, and James Henry Peters

We are pleased to tell you that your paper has been accepted for publication in The Journal of Physiology.

**TRANSPARENT PEER REVIEW POLICY:** To improve the transparency of its peer review process, The Journal of Physiology publishes online as supporting information the peer review history of all articles accepted for publication. Readers will have access to decision letters, including Editors' comments and referee reports, for each version of the manuscript, as well as any author responses to peer review comments. Referees can decide whether or not they wish to be named on the peer review history document.

The last Word (or similar) version of the manuscript provided will be used by the Production Editor to prepare your proof. When this is ready you will receive an email containing a link to Wiley's Online Proofing System. The proof should be thoroughly checked and corrected as promptly as possible.

Authors should note that it is too late at this point to offer corrections prior to proofing. The accepted version will be published online, ahead of the copy edited and typeset version being made available. Major corrections at proof stage, such as changes to figures, will be referred to the Editors for approval before they can be incorporated. Only minor changes, such as to style and consistency, should be made at proof stage. Changes that need to be made after proof stage will usually require a formal correction notice.

All queries at proof stage should be sent to: TJP@wiley.com.

Are you on Twitter? Once your paper is online, why not share your achievement with your followers? Please tag The Journal (@jphysiol) in any tweets and we will share your accepted paper with our 30,000 followers!

Yours sincerely,

David Wyllie  
Senior Editor  
The Journal of Physiology

P.S. - You can help your research get the attention it deserves! Check out Wiley's free Promotion Guide for best-practice recommendations for promoting your work at [www.wileyauthors.com/eoo/guide](http://www.wileyauthors.com/eoo/guide). You can learn more about Wiley Editing Services which offers professional video, design, and writing services to create shareable video abstracts, infographics, conference posters, lay summaries, and research news stories for your research at [www.wileyauthors.com/eoo/promotion](http://www.wileyauthors.com/eoo/promotion).

**IMPORTANT NOTICE ABOUT OPEN ACCESS:** To assist authors whose funding agencies mandate public access to published research findings sooner than 12 months after publication, The Journal of Physiology allows authors to pay an Open Access (OA) fee to have their papers made freely available immediately on publication.

The Corresponding Author will receive an email from Wiley with details on how to register or log-in to Wiley Authors Services where you will be able to place an order.

You can check if your funder or institution has a Wiley Open Access Account here: <https://authorservices.wiley.com/author-resources/Journal-Authors/licensing-and-open-access/open-access/author-compliance-tool.html>.

-----

#### EDITOR COMMENTS

Reviewing Editor:

The authors have addressed most of the minor concerns previously raised. One concern raised by a prior referee does still need to be addressed. Two of the references show up twice in the reference list -- the second listing of the two references are in lines 678 and 681 of the revised manuscript.

Senior Editor:

Thank you for revising your manuscript which I am delighted to accept for publication. You will see that there is still the issue with two references being duplicated in the reference list, but I think this can be dealt with at the Proof stage. Buijs, Scheer, et al correctly appears at Line 582 but is repeated, erroneously, at Line 678. Similarly, Konturek et al correctly appears at

Line 656 but is repeated, erroneously, at Line 681. Each easily corrected at Proof stage. Thank you for submitting this work to The Journal of Physiology.

**1st Confidential Review**

**24-Feb-2023**

---
